# Supplementary material for: Bone Marrow Endothelial Cells Increase Prostate Cancer Cell Apoptosis in 3D Triculture Model of Reactive Stroma
Source: MDPI journal article supplement (doi:10.3390/biology11091271), 2022-08-26
Supplement: s1 [file s1]

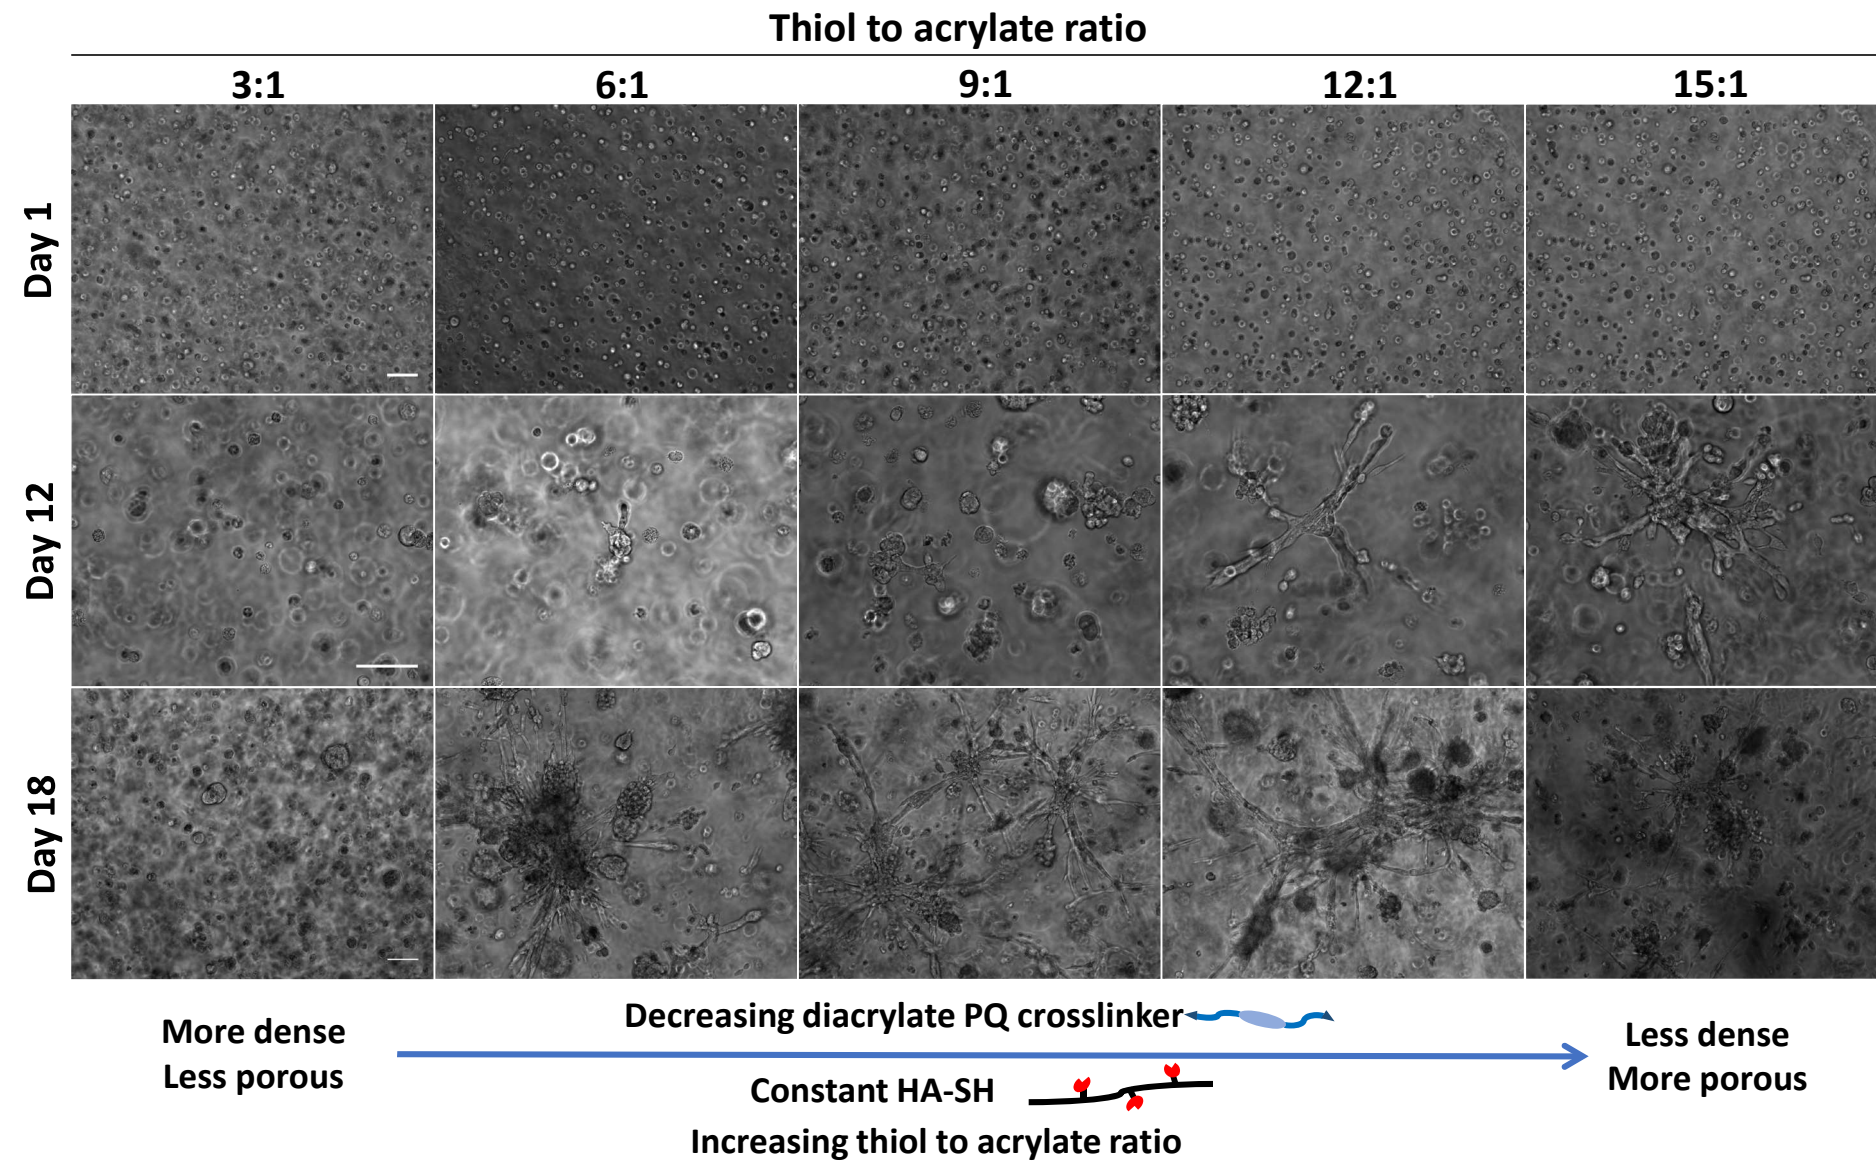

**Figure S1.** Lower hydrogel crosslinking density increases cellular invasion and organization.

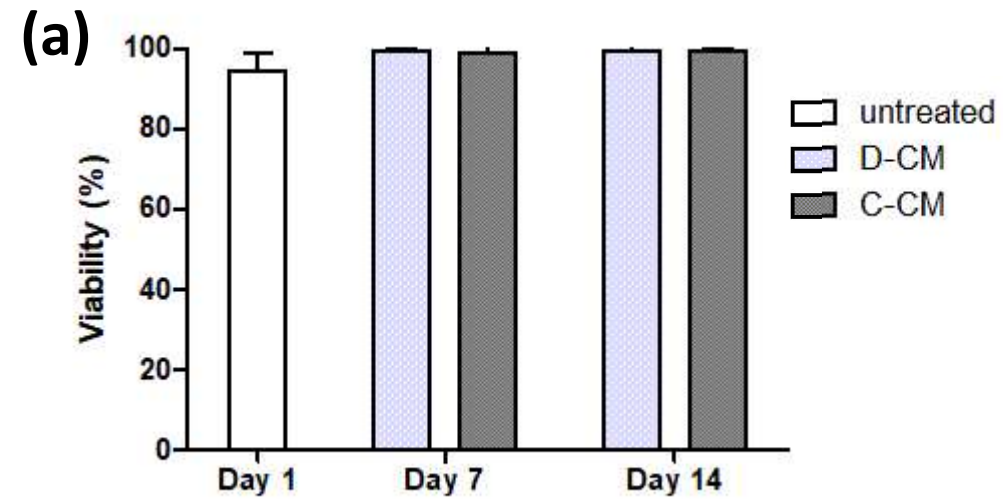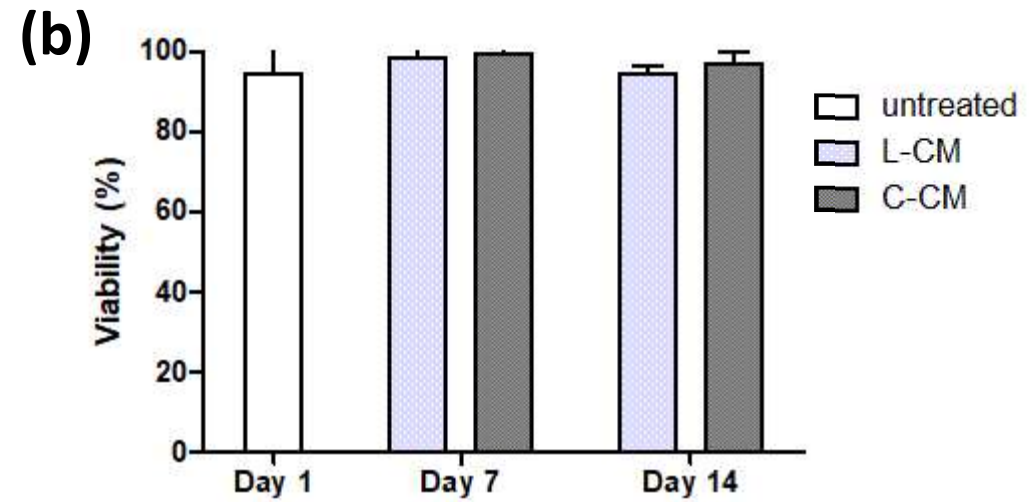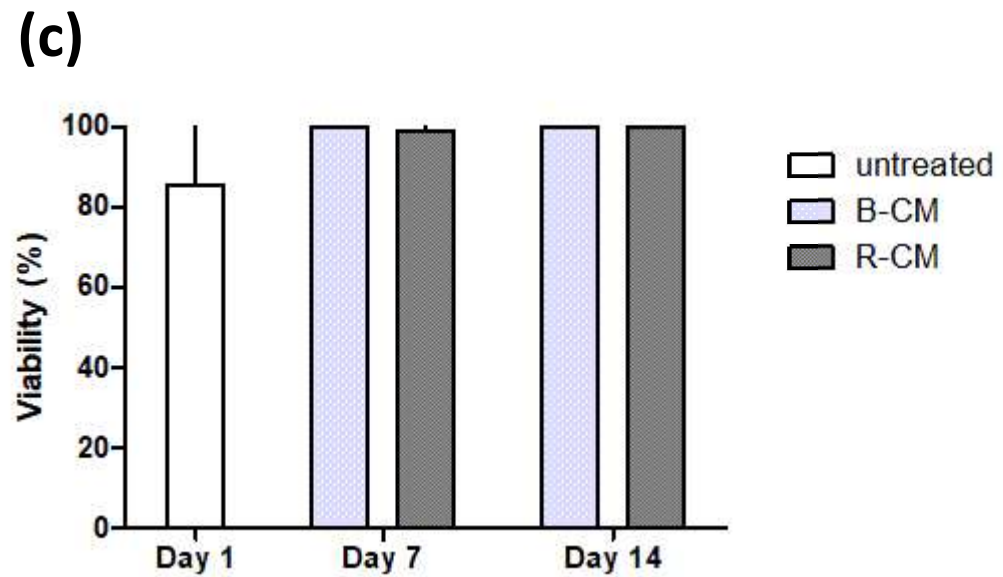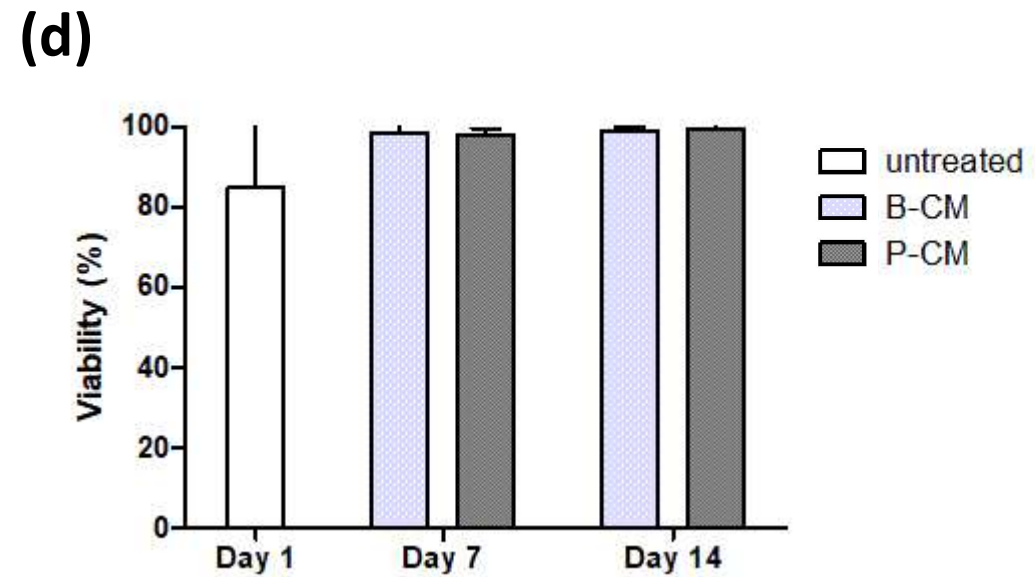

**Figure S2.** HMEC-1- and HULEC-5a-conditioned media do not affect C4-2B viability, and BMEC-conditioned medium does not affect 22Rv1 or PC3 viability.

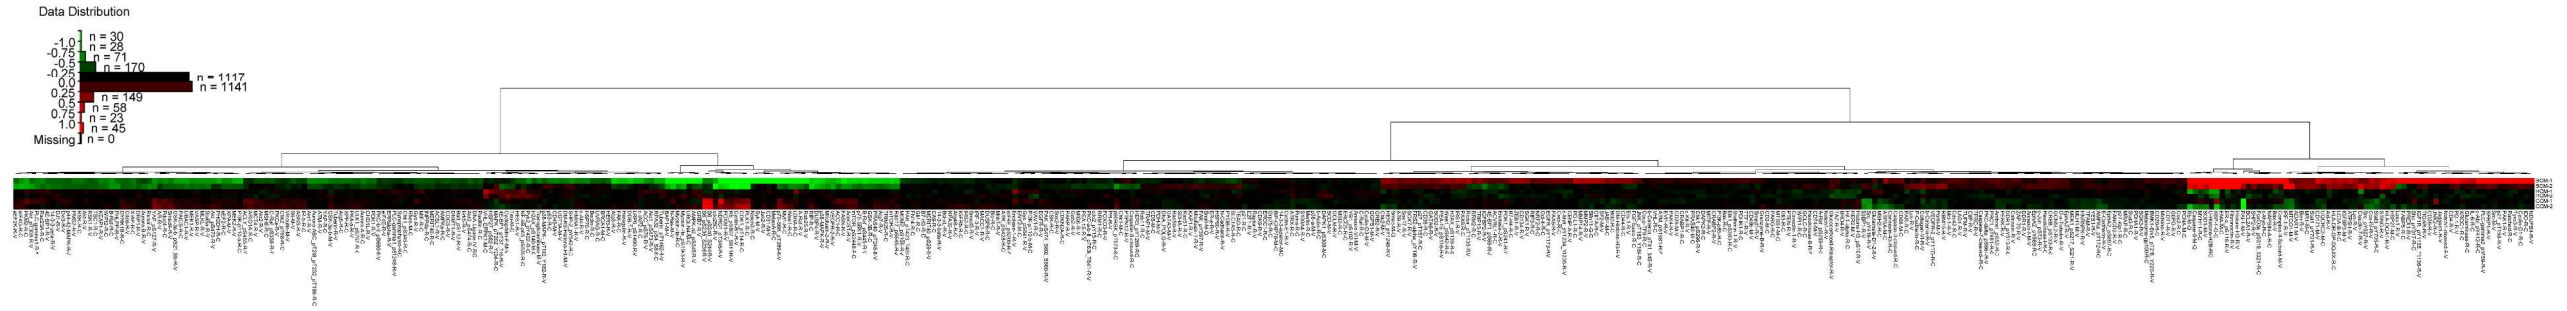

**Figure S3.** Full results of RPPA analysis.



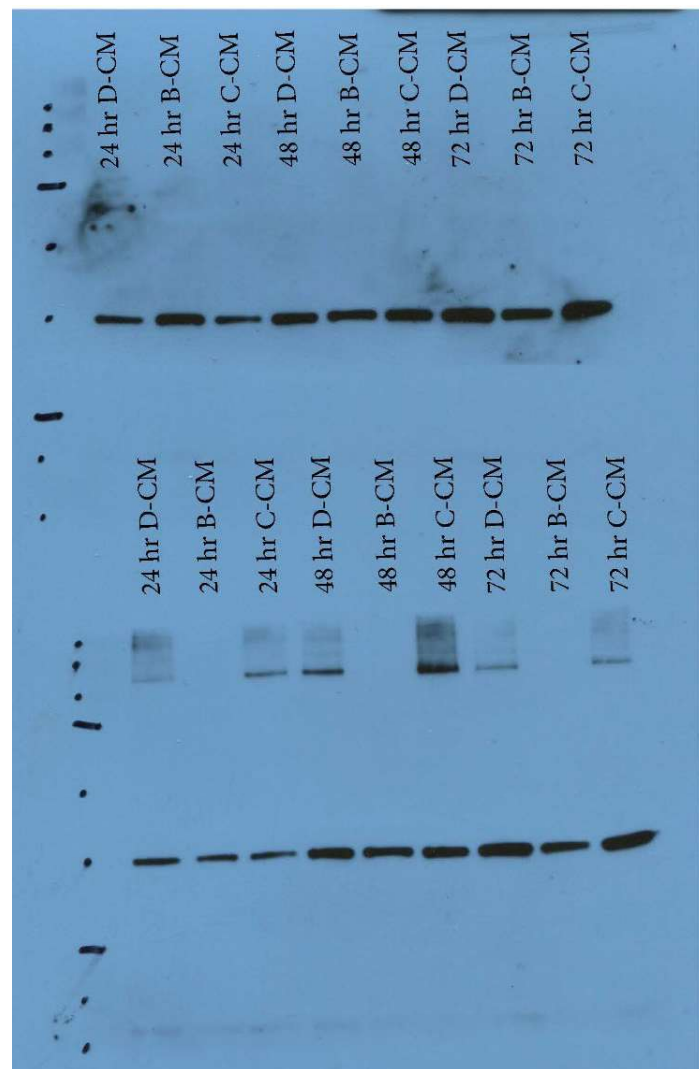

GAPDH in Figure 6b

pRb in Figure 6c

GAPDH in Figure 6c

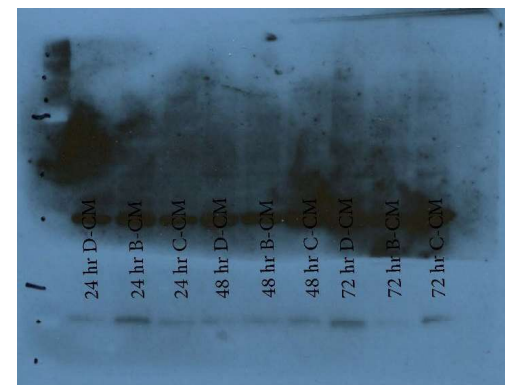

Smac in Figure 6b

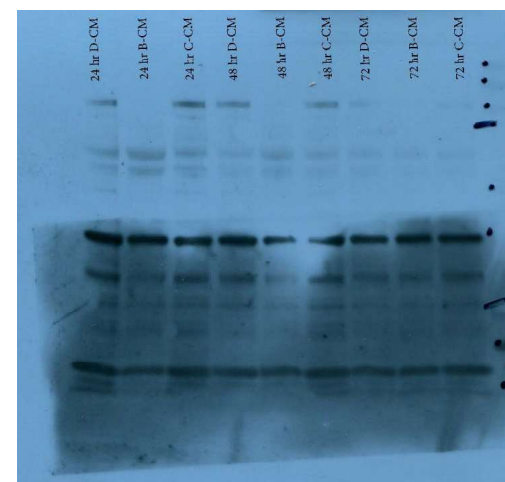

FOXM1 in Figure 6d

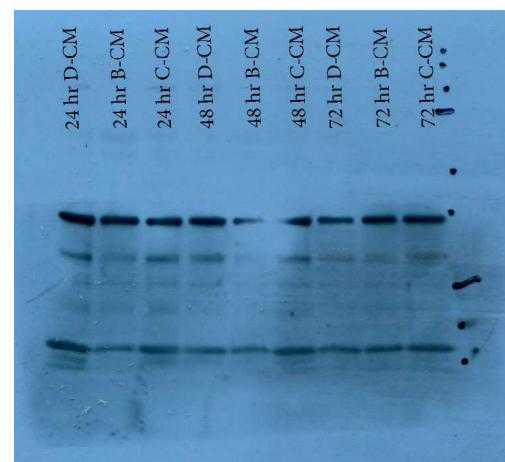

GAPDH in Figure 6d

**Figure S4.** Original images of full western blot.
